# Supplementary material for: A Modular Platform for Automated Organoid Culture and Longitudinal Imaging
Source: Research Square preprint supplement (doi:10.21203/rs.3.rs-7313439/v1), 2025-11-10
Supplement: Supplementary file 2 [file e4234afc1c17651f13abbb7e.pdf]

## **Supplementary Information**

### **Tables:**

Supplementary Table 1: Bills Summary.  
Supplementary Table 2: Components of the platform.  
Supplementary Table 3: Comprehensive Metabolic Panel.  
Supplementary Table 4: Statistical comparison of metabolite differences between our life support platform and standard tissue culture conditions.  
Supplementary Table 5: Organoid measures batch 1.  
Supplementary Table 6: Organoid measures batch 2.  
Supplementary Table 7: Organoid measures batch 3.  
Supplementary Table 8: Organoid normalized measures.  
Supplementary Table 9: ANOVA analysis for cross-sectional area measurements.  
Supplementary Table 10: Calibration curve at 0.52 W/mm<sup>2</sup> power intensity.  
Supplementary Table 11: Calibration curve at 0.79 W/mm<sup>2</sup> power intensity.  
Supplementary Table 12: CFD initial conditions.

### **Figures:**

Supplementary Figure 1: Resolution and Field of View (FOV) Assessment.  
Supplementary Figure 2: PDMS/Glass chip multiwell configuration.  
Supplementary Figure 3: Experimental design of the fluid flow characterization.  
Supplementary Figure 4: Viability of cortical organoids grown in the life support platform.  
Supplementary Figure 5: Viability of cortical organoids grown in a standard tissue culture incubator.  
Supplementary Figure 6: Viability of cortical organoids grown in the life support platform for well 3 of the multiwell approach.  
Supplementary Figure 7: Longitudinal growth of cortical organoid in batch 1.  
Supplementary Figure 8: Longitudinal growth of cortical organoid in batch 2.  
Supplementary Figure 9: Longitudinal growth of cortical organoid in batch 3.

Supplementary Table 1: Bills Summary

| Component                                        | Unit | Unit Cost (USD) | Subtotal | Source of Material                                                                                                                                                                                            | Model type/Material |
|--------------------------------------------------|------|-----------------|----------|---------------------------------------------------------------------------------------------------------------------------------------------------------------------------------------------------------------|---------------------|
| Arduino Mega 2560 R3                             | 1    | \$48.40         | \$48.40  | <a href="https://www.sparkfun.com/products/11061">https://www.sparkfun.com/products/11061</a>                                                                                                                 | DEV-11061 RoHS      |
| CD-40CO2/Temperature /Humidity Sensor            | 1    | \$44.95         | \$44.95  | <a href="https://www.adafruit.com/product/5187">https://www.adafruit.com/product/5187</a>                                                                                                                     | STEMMA QT / Qwiic   |
| FeatherS2 - ESP32                                | 1    | \$24.95         | \$24.95  | <a href="https://www.adafruit.com/product/4769">https://www.adafruit.com/product/4769</a>                                                                                                                     | S2                  |
| Cavro Centris Pump                               | 1    | \$5,000         | \$5,000  | <a href="https://partnering.tecan.com/cavro-centris-pump-for-oem-liquid-handling">https://partnering.tecan.com/cavro-centris-pump-for-oem-liquid-handling</a>                                                 | Cavro               |
| PTC Heating Element AC DC 12V Aluminum Shell     | 1    | \$7.51          | \$7.51   | <a href="https://www.amazon.com/Aluminum-Temperature-Thermostatic-Applicable-Miniature/dp/B07GBNGB4L/">https://www.amazon.com/Aluminum-Temperature-Thermostatic-Applicable-Miniature/dp/B07GBNGB4L/</a>       | Aluminum            |
| Uxcell 10K NTC Thermistor Probe                  | 1    | \$8.49          | \$8.49   | <a href="https://www.amazon.com/uxcell-Thermistor-Sensitive-Temperature-Conditioner/dp/B07LGLCYFP?th=1">https://www.amazon.com/uxcell-Thermistor-Sensitive-Temperature-Conditioner/dp/B07LGLCYFP?th=1</a>     | Epoxy               |
| W1209 12V DC Digital Temperature Controller      | 1    | \$8.49          | \$8.49   | <a href="https://www.amazon.com/Hiletgo-Temperature-Controller-Thermostat-One-Channel/dp/B07CH7W3XP?th=1">https://www.amazon.com/Hiletgo-Temperature-Controller-Thermostat-One-Channel/dp/B07CH7W3XP?th=1</a> | B07CH7W3XP          |
| Dino-Lite Edge                                   | 1    | \$899.00        | \$899.00 | <a href="https://www.auroraprosci.com/Digital-Microscope-AM4115T-GRFBY">https://www.auroraprosci.com/Digital-Microscope-AM4115T-GRFBY</a>                                                                     | AM4115TGRFBY        |
| ALITOVE 12V 5A 60W Power Supply Adapter          | 1    | \$12.99         | \$12.99  | <a href="https://www.amazon.com/dp/B078RY6Y3">https://www.amazon.com/dp/B078RY6Y3</a>                                                                                                                         | AL12V5AT            |
| 100ml Thick Glass Media Storage                  | 1    | \$6.99          | \$6.99   | <a href="https://www.amazon.com/Storage-Bottles-Graduations-Scientific-Containers/dp/B07Y65GN1S/">https://www.amazon.com/Storage-Bottles-Graduations-Scientific-Containers/dp/B07Y65GN1S/</a>                 | CQ15707             |
| TAILONZ PNEUMATIC 1/4 Inch NPT 12V/24V/110V/220V | 1    | \$17.99         | \$17.99  | <a href="https://www.amazon.com/Tailonz-Pneumatic-Electric-Solenoid-2W025-08/dp/B07X287BSX/?th=1">https://www.amazon.com/Tailonz-Pneumatic-Electric-Solenoid-2W025-08/dp/B07X287BSX/?th=1</a>                 | 2W025-08            |
| Raspberry Pi 4 Model B                           | 1    | \$77.99         | \$77.99  | <a href="https://www.amazon.com/Raspberry-Model-2019-Quad-Bluetooth/dp/B07TC2BK1X/">https://www.amazon.com/Raspberry-Model-2019-Quad-Bluetooth/dp/B07TC2BK1X/</a>                                             | RAS-4-4G            |
| ELECROW 5 Inch Raspberry Pi Screen Touchscreen   | 1    | \$43.99         | \$43.99  | <a href="https://www.amazon.com/Elecrow-800x480-Interface-Supports-Raspberry/dp/B013JECYF2/">https://www.amazon.com/Elecrow-800x480-Interface-Supports-Raspberry/dp/B013JECYF2/</a>                           | ILI9486L            |
| ph Kit Atlas Scientific                          | 1    | \$149.00        | \$149.00 | <a href="https://atlas-scientific.com/kits/ph-kit/">https://atlas-scientific.com/kits/ph-kit/</a>                                                                                                             | #KIT-101P           |
| Mini Lab Grade pH Probe                          | 1    | \$60.99         | \$60.99  | <a href="https://atlas-scientific.com/probes/miniprobe/">https://atlas-scientific.com/probes/miniprobe/</a>                                                                                                   | #ENV-20-pH          |
| SYLGARD™ 184 Silicone Elastomer Kit              | 1    | \$154           | \$154    | <a href="https://krayden.com/productdetail/dc4019862/dc-184-sylgard-05ka-11lb-kit">https://krayden.com/productdetail/dc4019862/dc-184-sylgard-05ka-11lb-kit</a>                                               | Silicone            |
| Plus Microscope Slides                           | 1    | \$211.50        | \$211.50 | <a href="https://www.fishersci.com/shop/products/fisherbrand-superfrost-plus-microscope-slides-2/1255015">https://www.fishersci.com/shop/products/fisherbrand-superfrost-plus-microscope-slides-2/1255015</a> | Glass               |
| Model Resin Formlabs                             | 1    | \$149           | \$149    | <a href="https://dental.formlabs.com/store/materials/model-resin/">https://dental.formlabs.com/store/materials/model-resin/</a>                                                                               | Resin               |

|                                              |   |          |          |                                                                                                                                                                                 |                         |
|----------------------------------------------|---|----------|----------|---------------------------------------------------------------------------------------------------------------------------------------------------------------------------------|-------------------------|
| <b>CO2 Stainless Steel Diffuser</b>          | 1 | \$15.99  | \$15.99  | <a href="https://www.amazon.com/YOU-Stainless-Diffuser-Regulator-Freshwater/">https://www.amazon.com/YOU-Stainless-Diffuser-Regulator-Freshwater/</a>                           | Stainless Steel         |
| <b>NeoPixel Ring</b>                         | 1 | \$16.95  | \$16.95  | <a href="https://www.adafruit.com/product/1586/">https://www.adafruit.com/product/1586/</a>                                                                                     | 5050 RGB LED            |
| <b>Adjustable Precision Mount</b>            | 1 | \$199.00 | \$199.00 | <a href="https://www.dinolite.us/products/accessories">https://www.dinolite.us/products/accessories</a>                                                                         | Stainless Steel         |
| <b>Polyvinylidene Fluoride (PVDF) Filter</b> | 1 | \$2.69   | \$2.69   | <a href="https://www.perkinelmer.com/product/filterpvdf-syringe-25mm-22um-pk-100-02542918">https://www.perkinelmer.com/product/filterpvdf-syringe-25mm-22um-pk-100-02542918</a> | Polyvinylidene fluoride |

Supplementary Table 2: Components of the platform

| Number | Descriptor                      | Repository                                             |
|--------|---------------------------------|--------------------------------------------------------|
| 1      | Arduino mega pH Solenoid.ino    | braingeneersdifussionproject/Arduino/                  |
| 2      | ImageProcessing.m               | braingeneersdifussionproject/MATLAB/                   |
| 3      | ObtainVideoFrames.m             | braingeneersdifussionproject/MATLAB/                   |
| 4      | ObtainVideoFrames V2.m          | braingeneersdifussionproject/MATLAB/                   |
| 5      | ReduceVideoSize.m               | braingeneersdifussionproject/MATLAB/                   |
| 6      | CO2TempHumidityRecording.py     | braingeneersdifussionproject/Python/Enviroment_Sensor/ |
| 7      | MainPumpProgramExe.py           | braingeneersdifussionproject/Python/Servo_Pump/Apps/   |
| 8      | PDMS_Mold_V1.stl                | braingeneersdifussionproject/Print_Files/              |
| 9      | Hole_Base.stl                   | braingeneersdifussionproject/Print_Files/              |
| 10     | BioChamber_Base.stl             | braingeneersdifussionproject/Print_Files/              |
| 11     | Cap_Biochamber.stl              | braingeneersdifussionproject/Print_Files/              |
| 12     | EnviromentalSensor_BaseCase.stl | braingeneersdifussionproject/Print_Files/              |
| 13     | EnviromentalSensor_TopCase.stl  | braingeneersdifussionproject/Print_Files/              |
| 14     | GFP_Chamber.stl                 | braingeneersdifussionproject/Print_Files/              |
| 15     | GFP_Chamber_Cap.stl             | braingeneersdifussionproject/Print_Files/              |
| 16     | Heater_Holder.stl               | braingeneersdifussionproject/Print_Files/              |
| 17     | Heater_Holder_Biochamber.stl    | braingeneersdifussionproject/Print_Files/              |
| 18     | Holder_Biochamber_Left.stl      | braingeneersdifussionproject/Print_Files/              |
| 19     | Holder_Biochamber_Rigth.stl     | braingeneersdifussionproject/Print_Files/              |
| 20     | Microscope_Holder.stl           | braingeneersdifussionproject/Print_Files/              |
| 21     | Pump_Holder .stl                | braingeneersdifussionproject/Print_Files/              |
| 22     | RaspberryPi_Holder.stl          | braingeneersdifussionproject/Print_Files/              |
| 23     | ReservoirCap_Left.stl           | braingeneersdifussionproject/Print_Files/              |
| 24     | ReservoirCap_Rigth.stl          | braingeneersdifussionproject/Print_Files/              |
| 25     | SourcePower_Holder.stl          | braingeneersdifussionproject/Print_Files/              |
| 26     | pHController_Botom.stl          | braingeneersdifussionproject/Print_Files/              |
| 27     | pHController_Top.stl            | braingeneersdifussionproject/Print_Files/              |
| 28     | CO2_Holder.stl                  | braingeneersdifussionproject/Print_Files/              |
| 29     | RawData                         | braingeneersdifussionproject/RawData/                  |

Supplementary Table 3. Comprehensive Metabolic Panel

| Test name               | Unit | Fresh Media | Platform D3 |        |        | Incubator D6 |        |        | Platform D6 |        |        |
|-------------------------|------|-------------|-------------|--------|--------|--------------|--------|--------|-------------|--------|--------|
|                         |      |             | B1          | B2     | B3     | B1           | B2     | B3     | B1          | B2     | B3     |
| <b>pH</b>               | -    | 7.82        | 7.88        | 7.85   | 7.44   | 7.83         | 7.82   | 7.81   | 7.59        | 7.69   | 7.21   |
| <b>cGlu</b>             | g/L  | 2.92        | 2.93        | 3.44   | 2.96   | 2.63         | 3.20   | 2.78   | 2.77        | 3.36   | 3.10   |
| <b>cK</b>               | mM   | 3.87        | 3.90        | 6.40   | 6.00   | 4.10         | 5.60   | 4.40   | 4.90        | 5.80   | 6.00   |
| <b>cNa<sup>+</sup></b>  | mM   | 146.00      | 146.00      | 174.00 | 157.00 | 152.00       | 218.00 | 185.00 | 138.00      | 169.00 | 182.00 |
| <b>cCa<sup>2+</sup></b> | mM   | 0.80        | 0.85        | 0.87   | 0.78   | 0.86         | 1.08   | 0.91   | 0.79        | 0.89   | 0.84   |
| <b>cCl<sup>-</sup></b>  | mM   | 123.00      | 125.00      | 149.00 | 129.00 | 130.00       | 184.00 | 141.00 | 119.00      | 144.00 | 135.00 |



Supplementary Table 4. Statistical comparison of metabolite differences between our life support platform and standard tissue culture conditions

| Metabolite                                                                   | Chi-Square | df | p-Value |
|------------------------------------------------------------------------------|------------|----|---------|
| pH                                                                           | 4.79       | 3  | 0.1874  |
| cGlu                                                                         | 2.93       | 3  | 0.4012  |
| cK                                                                           | 7.32       | 3  | 0.0623  |
| cNa+                                                                         | 3.55       | 3  | 0.2073  |
| cCa2+                                                                        | 5.12       | 3  | 0.1630  |
| cCl-                                                                         | 4.19       | 3  | 0.1781  |
| *The margin of error presented here corresponds to a 95% confidence interval |            |    |         |

Supplementary Table 5: Organoid cross-sectional measures batch 1 in mm<sup>2</sup>.

| Days | PG0  | PG1  | PG2  | PG3  | Average PG | Standard Deviation |
|------|------|------|------|------|------------|--------------------|
| 15   | 0.35 | 0.34 | 0.37 | 0.35 | 0.35       | 0.012              |
| 16   | 0.39 | 0.34 | 0.39 | 0.38 | 0.38       | 0.02               |
| 17   | 0.42 | 0.40 | 0.43 | 0.42 | 0.42       | 0.01               |
| 18   | 0.43 | 0.40 | 0.43 | 0.43 | 0.42       | 0.01               |
| 19   | 0.44 | 0.42 | 0.44 | 0.43 | 0.43       | 0.01               |
| 20   | 0.45 | 0.42 | 0.49 | 0.46 | 0.45       | 0.03               |

Supplementary Table 6: Organoid cross-sectional measures batch 2 in mm<sup>2</sup>.

| Days | PG0  | PG1  | Average PG | Standard Deviation |
|------|------|------|------------|--------------------|
| 15   | 2.02 | 2.03 | 0.006      | 2.02               |
| 16   | 2.26 | 2.06 | 0.146      | 2.16               |
| 17   | 2.35 | 2.11 | 0.175      | 2.23               |
| 18   | 2.48 | 2.11 | 0.264      | 2.29               |
| 19   | 2.51 | 2.14 | 0.261      | 2.32               |
| 20   | 2.71 | 2.28 | 0.304      | 2.50               |

Supplementary Table 7: Organoid cross-sectional measures batch 3 in mm<sup>2</sup>.

| Days | PG0  | PG1  | PG2  | Average PG | Standard Deviation |
|------|------|------|------|------------|--------------------|
| 15   | 1.16 | 1.27 | 1.47 | 0.162      | 1.30               |
| 16   | 1.36 | 1.49 | 1.61 | 0.122      | 1.49               |
| 17   | 1.43 | 1.57 | 1.63 | 0.099      | 1.54               |
| 18   | 1.50 | 1.68 | 1.73 | 0.121      | 1.63               |
| 19   | 1.50 | 1.68 | 1.75 | 0.129      | 1.64               |
| 20   | 1.52 | 1.69 | 1.78 | 0.135      | 1.66               |

Supplementary Table 8: Organoid normalized measures.

| Days | Z1    | Z1    | Z1    | Z1    | Z2    | Z2    | Z3     | Z3    | Z3    |
|------|-------|-------|-------|-------|-------|-------|--------|-------|-------|
| 0    | 0.00  | 0.00  | 0.00  | 0.00  | 0.00  | 0.00  | 0.00   | 0.00  | 0.00  |
| 1    | -1.57 | -3.00 | 4.99  | -0.43 | -0.22 | 0.22  | -11.11 | -2.33 | 13.44 |
| 2    | 10.70 | -2.14 | 12.41 | 8.70  | 11.78 | 1.56  | 4.90   | 14.83 | 23.76 |
| 3    | 18.97 | 12.70 | 22.11 | 20.97 | 16.28 | 4.08  | 10.36  | 20.45 | 25.37 |
| 4    | 23.82 | 14.98 | 23.54 | 21.83 | 22.55 | 4.12  | 15.29  | 28.99 | 32.99 |
| 5    | 25.25 | 18.97 | 25.53 | 23.54 | 23.88 | 5.66  | 15.44  | 29.45 | 34.76 |
| 6    | 28.96 | 18.69 | 39.80 | 30.96 | 33.86 | 12.62 | 16.75  | 29.99 | 37.22 |

Supplementary Table 9: ANOVA analysis for cross-sectional area measurements.

|          | sum_sq         | DF | F(Anova)  | p(>F)         |
|----------|----------------|----|-----------|---------------|
| C(Batch) | 0.00585120068  | 2  | 4.1635356 | 0.08621606872 |
| Residual | 0.003513360544 | 5  |           |               |

Supplementary Table 10: Calibration curve at 0.52 W/mm2 power intensity.

| Con. (mM) | M1              |                 | M2              |                 | M3              |                 | Standard Deviation | Power Intensity Average |
|-----------|-----------------|-----------------|-----------------|-----------------|-----------------|-----------------|--------------------|-------------------------|
|           | Pixel Intensity | Power Intensity | Pixel Intensity | Power Intensity | Pixel Intensity | Power Intensity |                    |                         |
| 0         | 6.460           | 0.146           | 4.474           | 0.101           | 4.526           | 0.102           | 0.026              | 0.117                   |
| 1         | 8.110           | 0.183           | 4.544           | 0.103           | 4.504           | 0.102           | 0.047              | 0.129                   |
| 2         | 9.770           | 0.221           | 12.822          | 0.290           | 12.786          | 0.289           | 0.040              | 0.267                   |
| 3         | 11.420          | 0.258           | 7.666           | 0.173           | 7.620           | 0.172           | 0.049              | 0.201                   |
| 4         | 13.070          | 0.296           | 11.063          | 0.250           | 10.993          | 0.249           | 0.027              | 0.265                   |
| 5         | 14.730          | 0.333           | 12.799          | 0.289           | 12.716          | 0.288           | 0.026              | 0.303                   |
| 6         | 16.380          | 0.370           | 18.004          | 0.407           | 18.012          | 0.407           | 0.021              | 0.395                   |
| 7         | 18.030          | 0.408           | 20.081          | 0.454           | 20.170          | 0.456           | 0.027              | 0.439                   |
| 8         | 19.680          | 0.445           | 20.062          | 0.454           | 20.031          | 0.453           | 0.005              | 0.451                   |
| 9         | 21.340          | 0.483           | 20.621          | 0.466           | 20.561          | 0.465           | 0.010              | 0.471                   |
| 10        | 22.990          | 0.520           | 21.460          | 0.485           | 21.388          | 0.484           | 0.020              | 0.496                   |

Supplementary Table 11: Calibration curve at 0.79 W/mm2 power intensity.

| Con. (mM) | M1              |                 | M2              |                 | M3              |                 | Standard Deviation | Power Intensity Average |
|-----------|-----------------|-----------------|-----------------|-----------------|-----------------|-----------------|--------------------|-------------------------|
|           | Pixel Intensity | Power Intensity | Pixel Intensity | Power Intensity | Pixel Intensity | Power Intensity |                    |                         |
| 0         | 8.913           | 0.147           | 8.389           | 0.139           | 8.861           | 0.147           | 0.005              | 0.144                   |
| 1         | 12.798          | 0.212           | 10.178          | 0.168           | 9.413           | 0.156           | 0.029              | 0.179                   |
| 2         | 16.683          | 0.276           | 13.115          | 0.217           | 14.011          | 0.232           | 0.031              | 0.242                   |
| 3         | 20.568          | 0.340           | 20.651          | 0.342           | 20.510          | 0.339           | 0.001              | 0.340                   |
| 4         | 24.453          | 0.404           | 24.227          | 0.401           | 23.251          | 0.385           | 0.011              | 0.397                   |
| 5         | 28.337          | 0.469           | 30.524          | 0.505           | 30.891          | 0.511           | 0.023              | 0.495                   |

|           |        |       |        |       |        |       |       |       |
|-----------|--------|-------|--------|-------|--------|-------|-------|-------|
| <b>6</b>  | 32.222 | 0.533 | 36.171 | 0.598 | 36.663 | 0.606 | 0.040 | 0.579 |
| <b>7</b>  | 36.107 | 0.597 | 37.482 | 0.620 | 37.538 | 0.621 | 0.013 | 0.613 |
| <b>8</b>  | 39.992 | 0.661 | 42.667 | 0.706 | 43.418 | 0.718 | 0.030 | 0.695 |
| <b>9</b>  | 43.877 | 0.726 | 40.388 | 0.668 | 40.023 | 0.662 | 0.035 | 0.685 |
| <b>10</b> | 47.762 | 0.790 | 47.361 | 0.783 | 47.865 | 0.792 | 0.004 | 0.788 |

Supplementary Table 12. CFD Initial Conditions.

| <b>Variable</b>                            | <b>Value</b>           | <b>Units</b>       |
|--------------------------------------------|------------------------|--------------------|
| <b>Inlet-Outlet Initial Velocities</b>     | 0.02                   | m/s                |
| <b>Diffusion Coefficient<sup>[1]</sup></b> | $1.00 \times 10^{-10}$ | m <sup>2</sup> /s  |
| <b>Initial Concentration</b>               | 10                     | mol/m <sup>3</sup> |
| <b>Density</b>                             | 1000                   | kg/m <sup>3</sup>  |
| <b>Dynamic Viscosity</b>                   | 0.002-0.003            | Pa.s               |
| <b>Porosity</b>                            | 0.15                   | a.u.               |
| <b>Number of elements</b>                  | 519.830                | Elements           |

USAF 1951 resolution test target

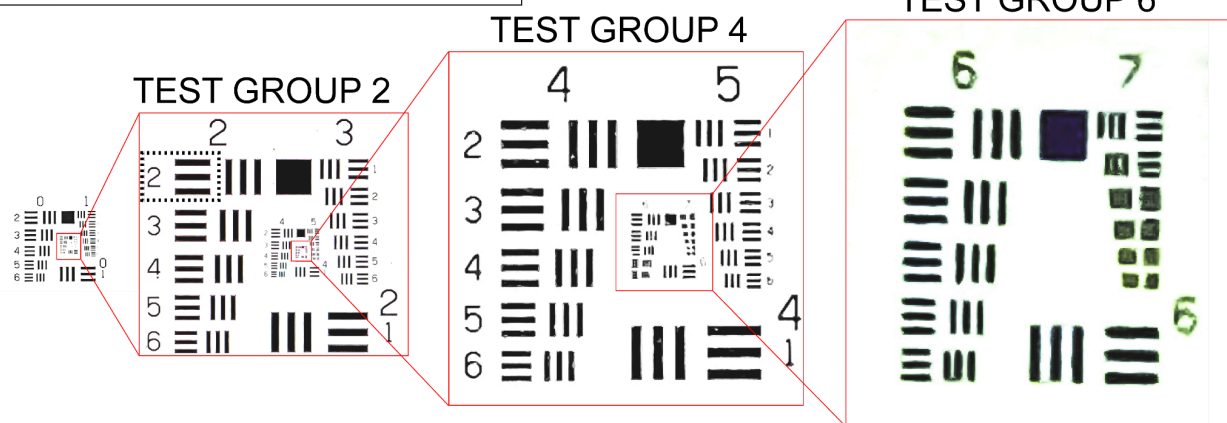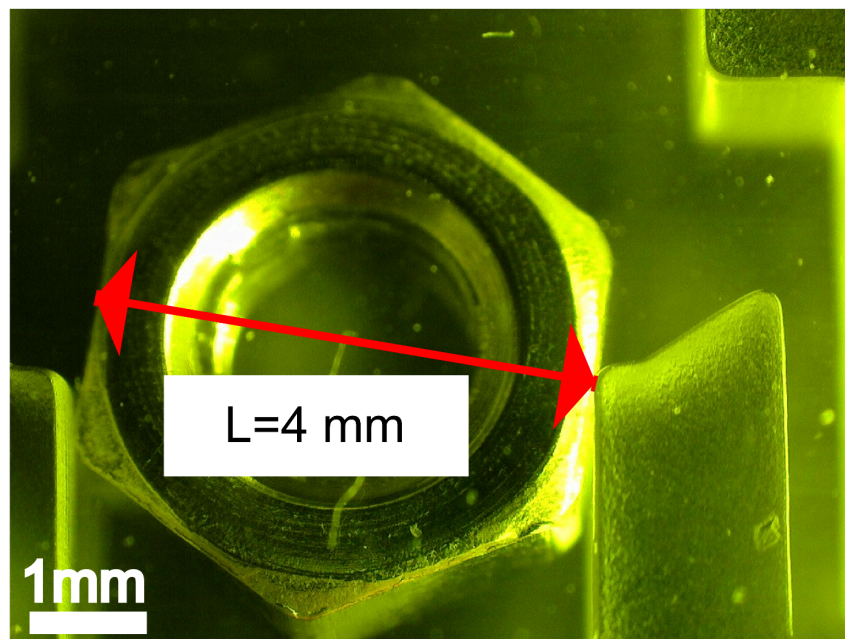

Supplementary Figure 1. Resolution and Field of View (FOV) Assessment. To assess the imaging resolution, a USAF 1951 resolution test target was used. Based on the captured images, the system resolved features up to Group 2, Element 2 (black dotted square), corresponding to 4.00 line pairs per millimeter (lp/mm), or approximately 4 mm resolution. The image below illustrates the total field of view (FOV), with the central region highlighted—this area was used for resolution analysis.

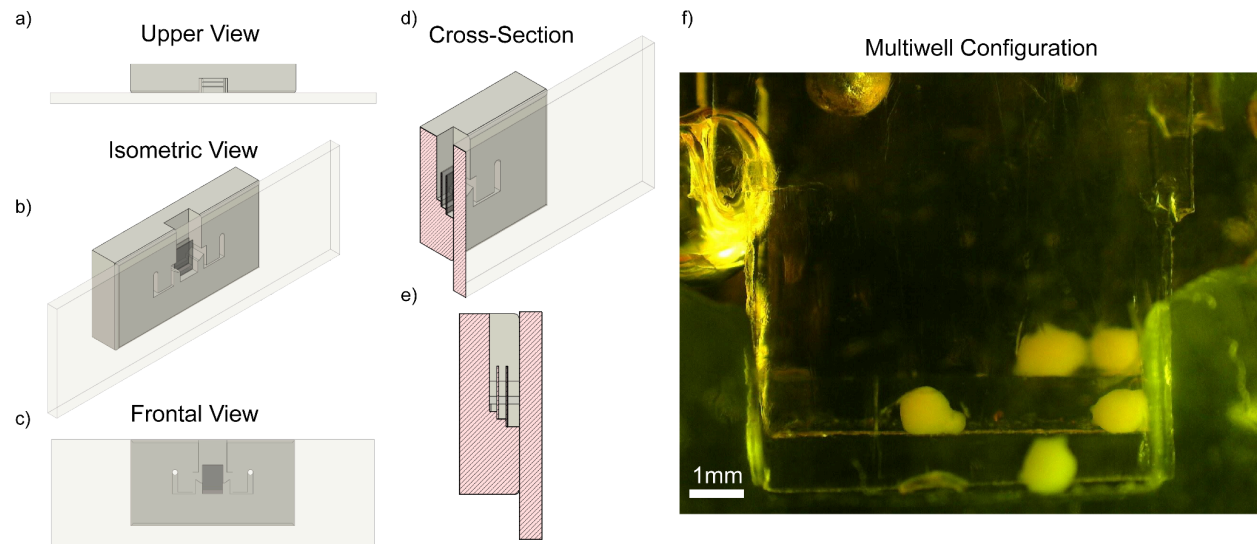

Supplementary Figure 2. Multiwell PDMS/Glass chip design and experimental validation for 3D organoid culture. **(a–e)** Design schematics of the multi-layer PDMS-glass microfluidic device. **a)** Side view showing chamber depth and channel arrangement. **b)** Transparent 3D overview highlighting the central chamber and side channels. **c)** Sectional 3D cutaway revealing vertical geometry and inlet-outlet positioning for media circulation. **d)** Detailed vertical cross-section through the chamber, indicating the stair-stepped architecture for organoid trapping and media perfusion. **e)** Top-down view of the whole device layout, displaying inlet ports and chamber configuration. **f)** Bright field image of the fabricated microfluidic chip seeded with cerebral organoids. The chamber contains multiple trapped organoids arranged along the stepped geometry. The 1 mm scale bar confirms chamber compatibility with tissue sizes in the range of ~500–800  $\mu\text{m}$ , enabling confined long-term culture under continuous flow conditions.

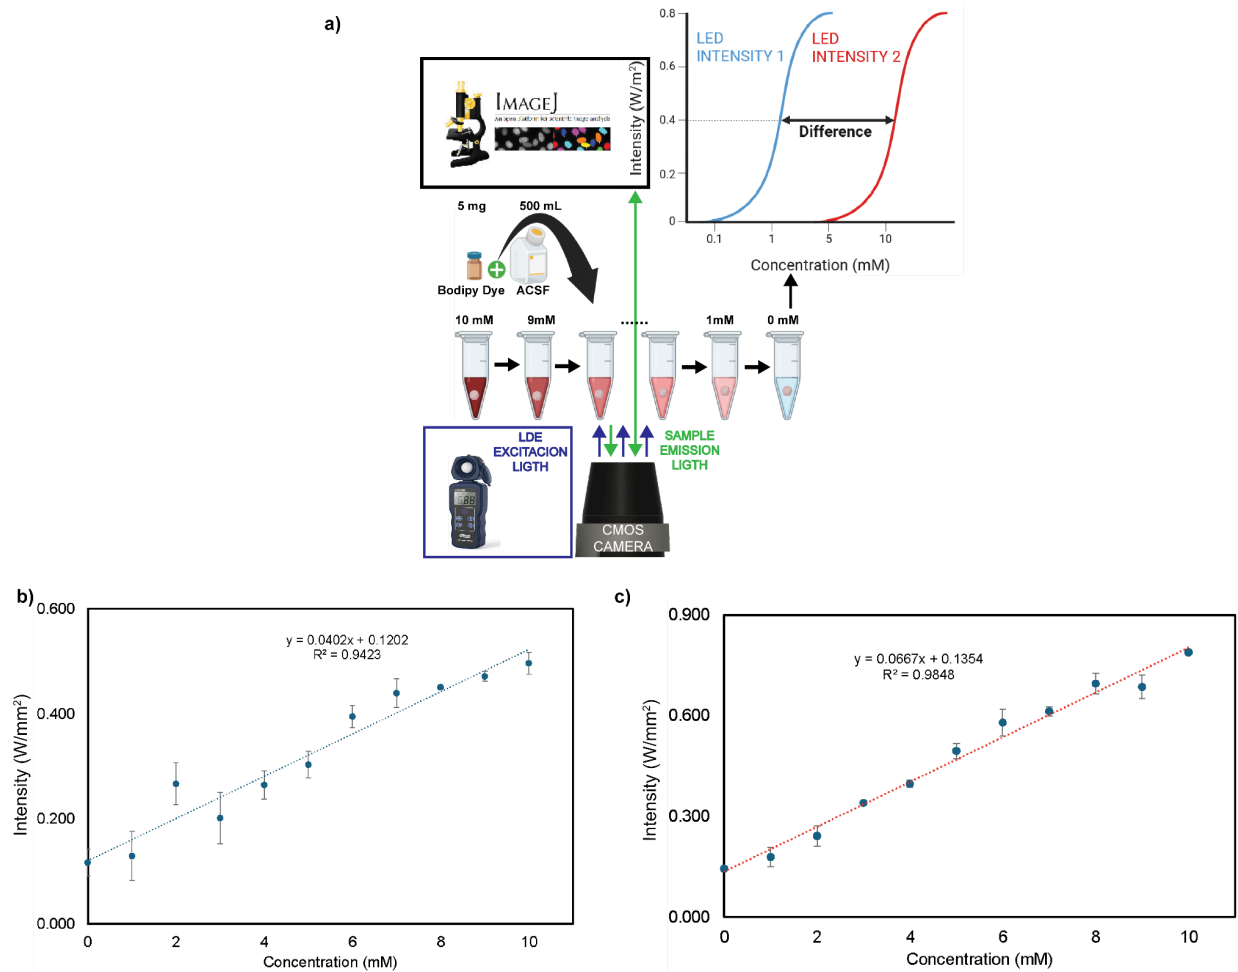

Supplementary Figure 3. illustrates the calibration and recording procedure for absorbing the green Bodipy dye. Panel **a)** The green BODIPY dye was diluted in ACSF medium to achieve concentrations ranging from 0 to 10 mM. The dye was then imaged using the AM4115T-GRFBY Dinolite, which provides camera capture and light source generation capabilities. The light intensity was measured in lux (LX) using a LX1332B light meter corresponding to the blue square. The microscope could switch between six intensity levels, with the two highest levels selected for constructing the calibration curves. ImageJ measured the intensity levels from the microscope camera, corresponding to the black square. LX was converted to lumens and power intensity ( $\text{W}/\text{mm}^2$ ). The calibration curve was generated using ten concentration points and replicated thrice. Panel **b)** shows the calibration curve for the  $0.52 \text{ W}/\text{mm}^2$  value, corresponding to the second-highest intensity. Panel **c)** shows the highest intensity of  $0.79 \text{ W}/\text{mm}^2$ . Other intensity points were not considered due to their lack of emission. The process of concentration intensity calibration for the highest intensities is shown in supplementary tables 8 and 9, respectively. Figure 3a was produced in Biorender, Image J, photograph taken by the authors, and edited in Adobe Illustrator.

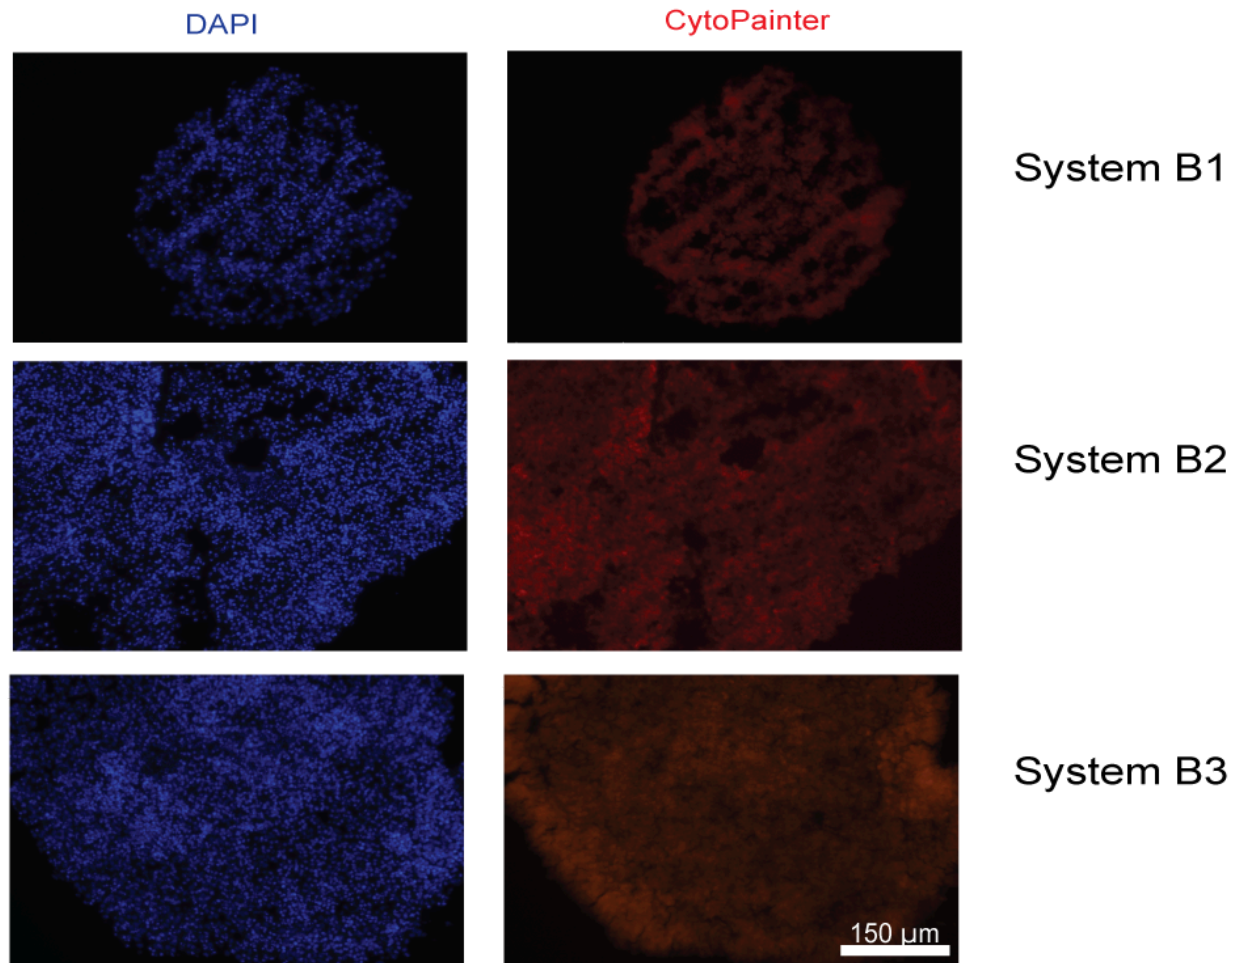

Supplementary Figure 4. Viability of cortical organoids grown in our life support platform. Representative images of D20 cortical organoids stained with CytoPainter after 120 hours are on our life support platform. A representative image from the three batches (b) analyzed is shown.



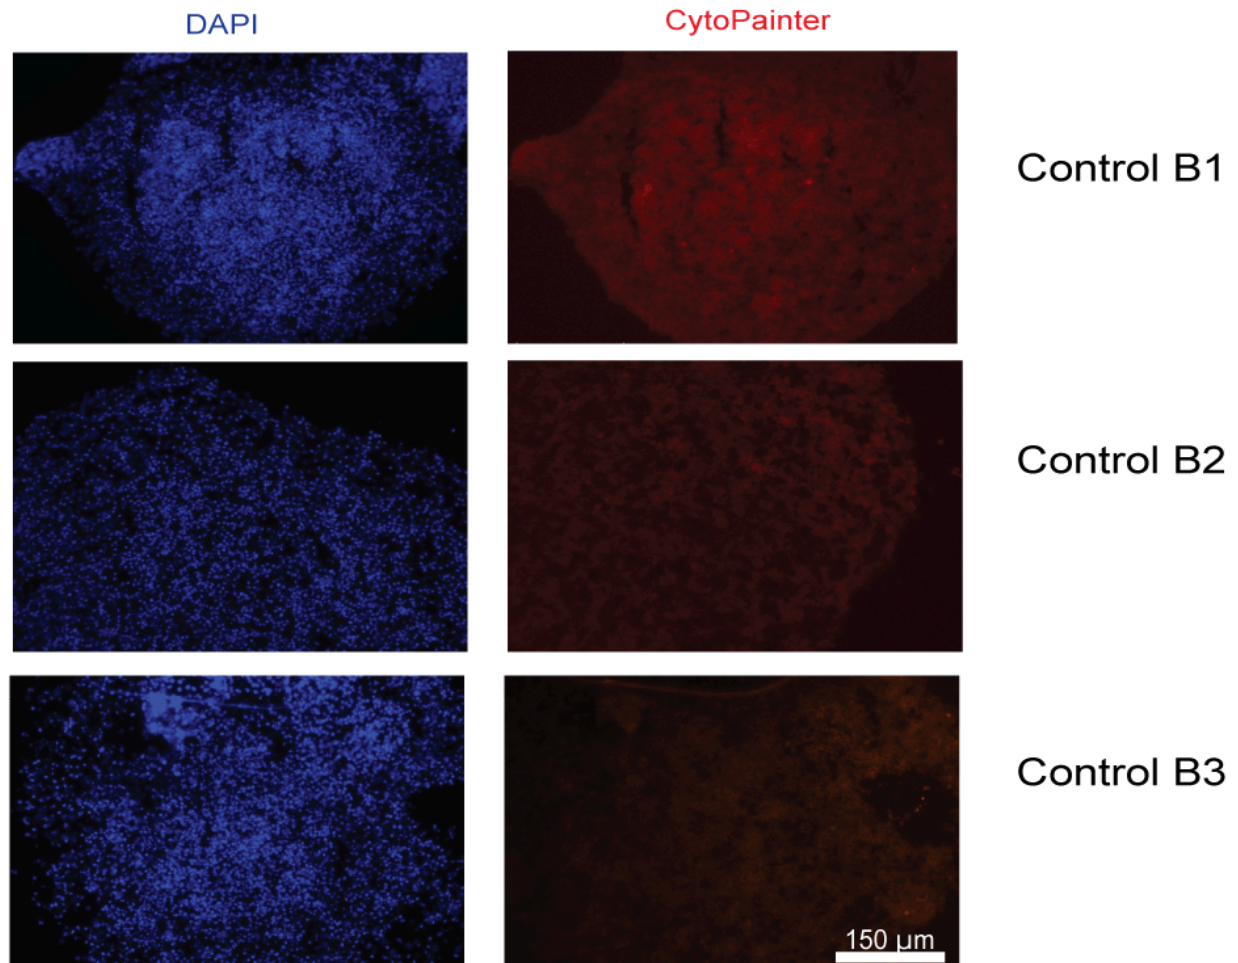

Supplementary Figure 5. Viability of cortical organoids grown in a standard tissue culture incubator. Representative images of D20 cortical organoids stained with CytoPainter. Organoids were grown in standard tissue culture conditions. A representative image from the three batches (b) analyzed is shown.



**a)**

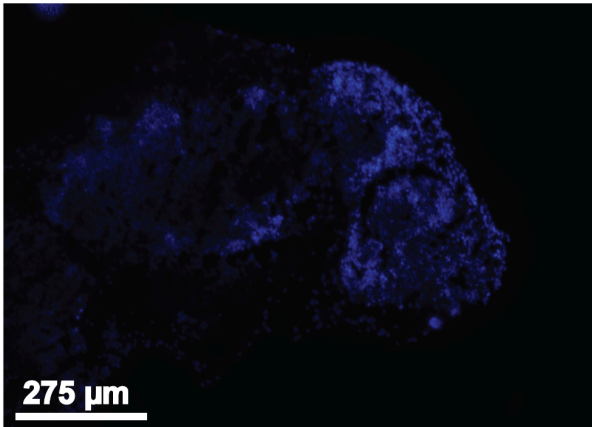

**b)**

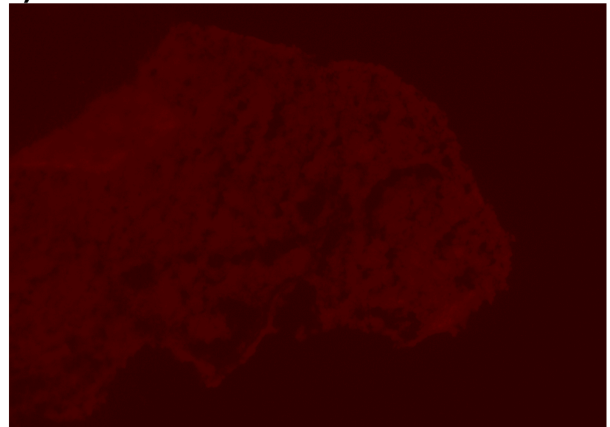

Supplementary Figure 6. Viability of cortical organoids grown in a standard tissue culture incubator. Representative images of D20 cortical organoids stained with CytoPainter. Organoids were grown in standard tissue culture conditions. A representative image from well 3 in the multiwell chip approach, (a) staining in DAPI, and (b) stained with CytoPainter.

a)

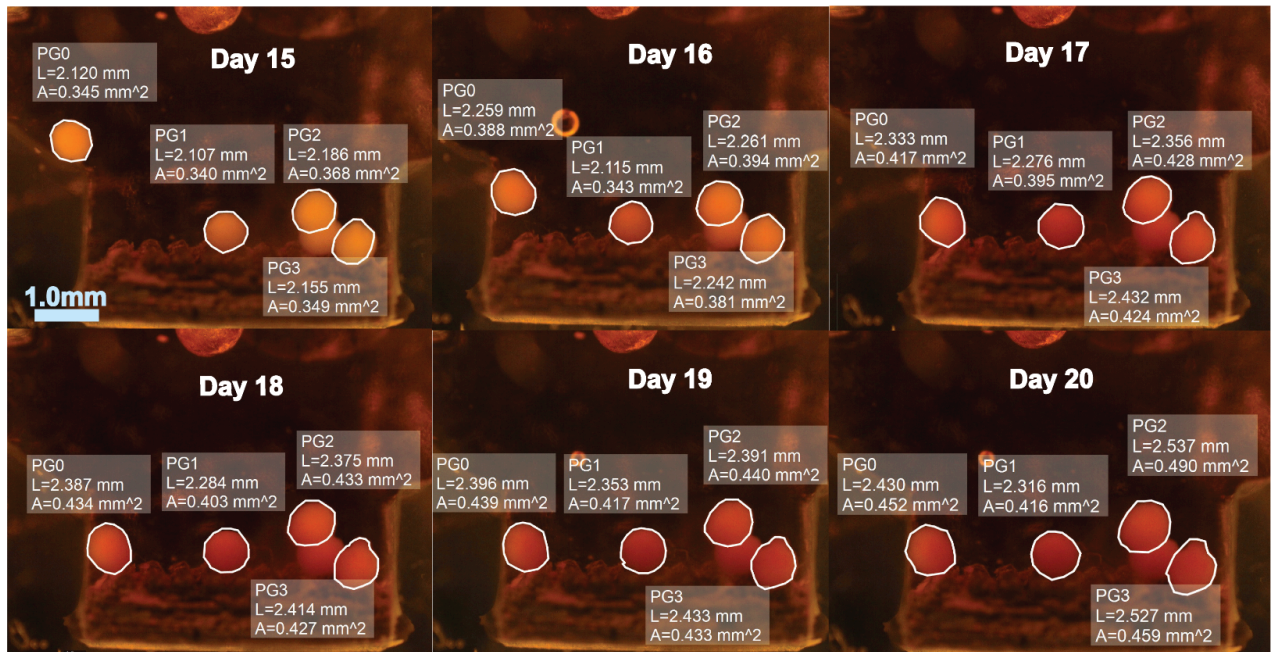

b)

### Average of organoid growth

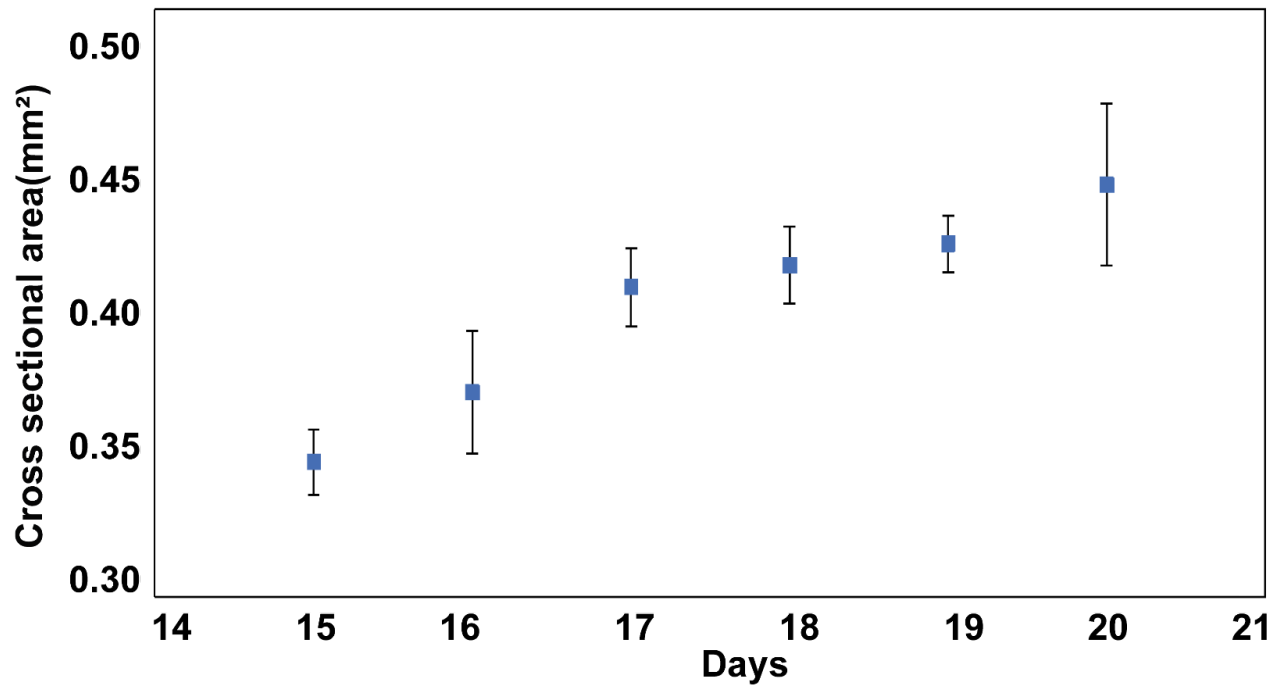

Supplementary Figure 7. Longitudinal growth of cortical organoid in batch 1. a) Estimated area. b) adjusted growth curve over 6 days.

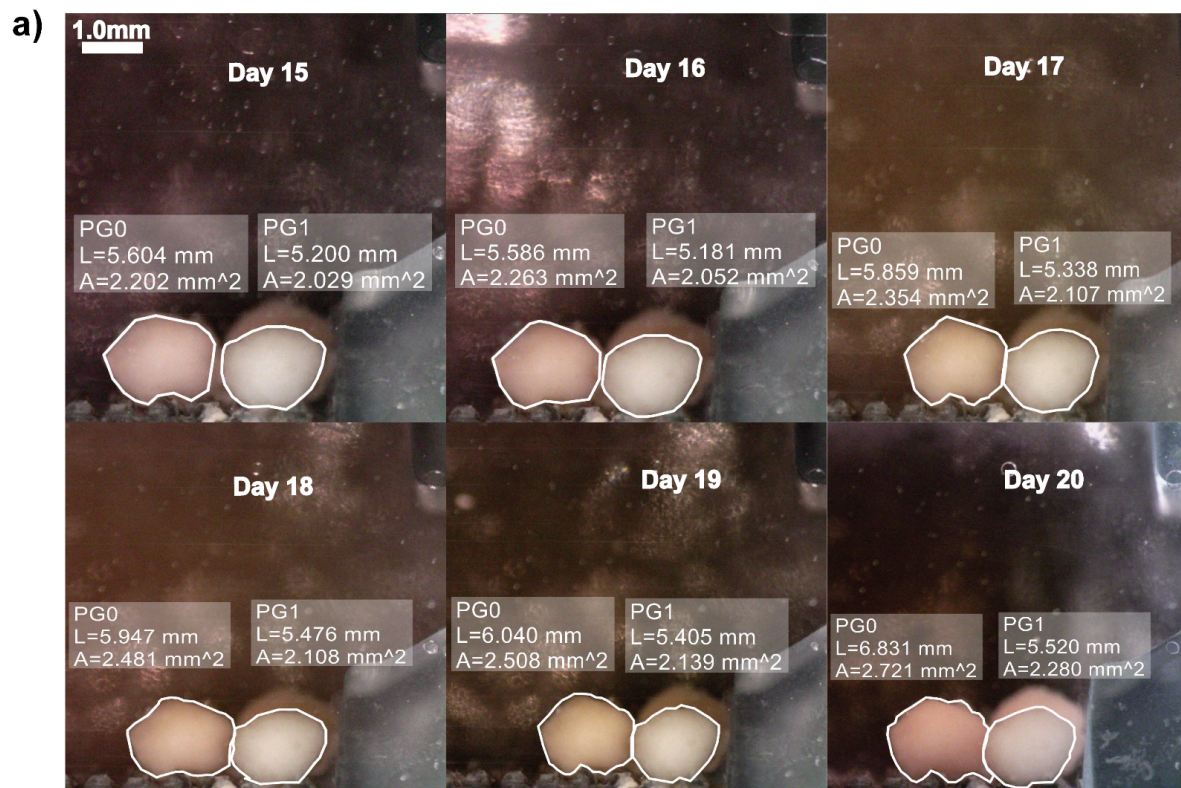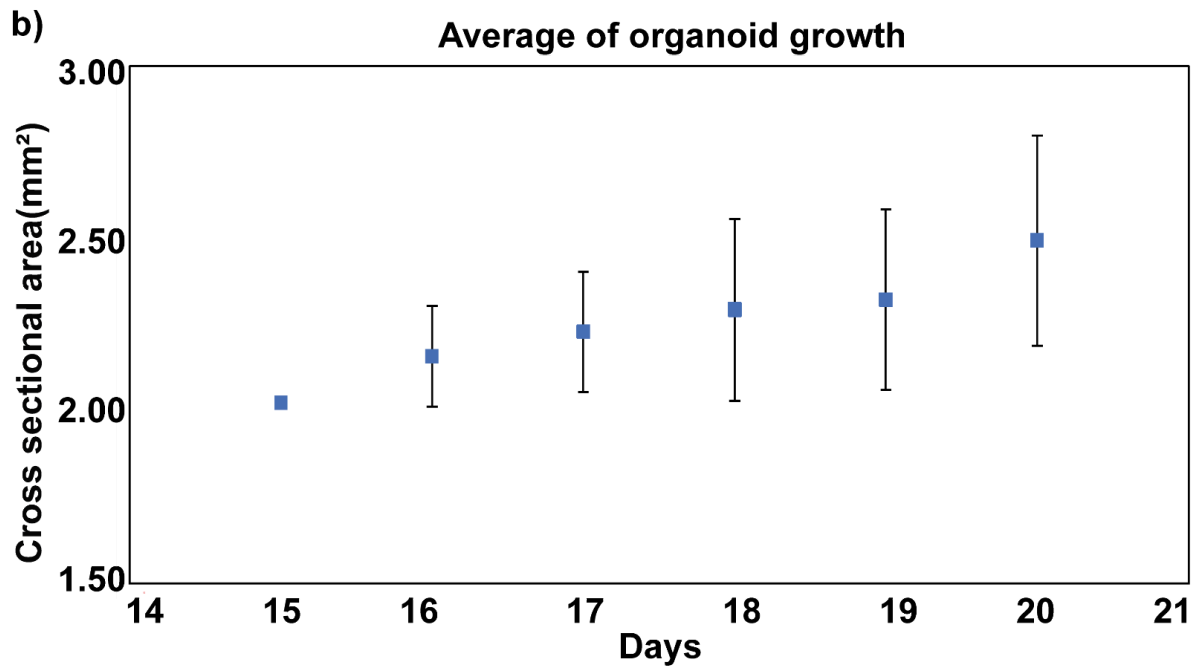

Supplementary Figure 8. Longitudinal growth of cortical organoid in batch 2. a) Estimated area. b) adjusted growth curve over 6 days.



a)

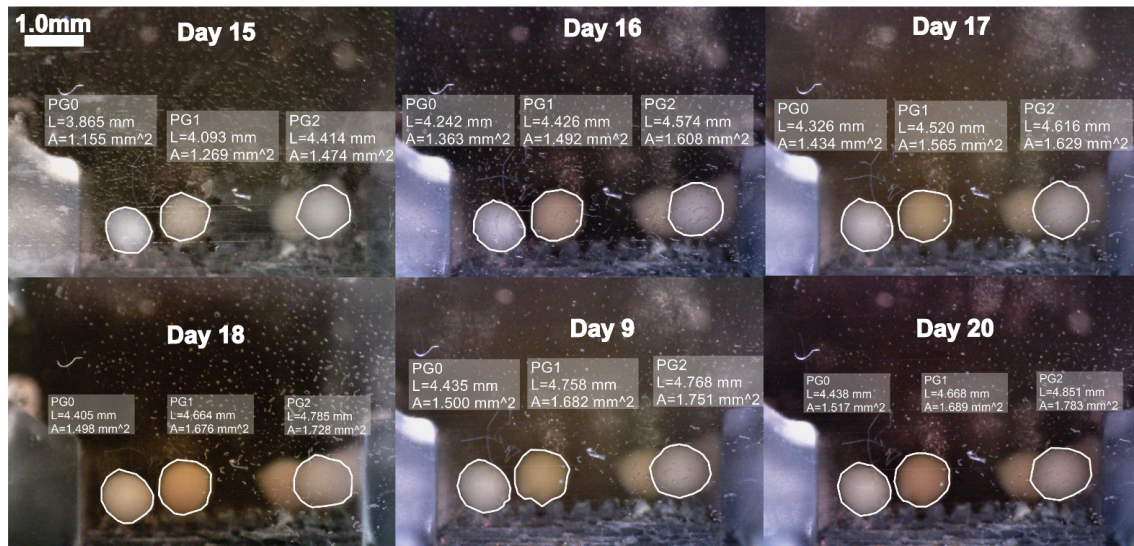

b)

### Average of organoid growth

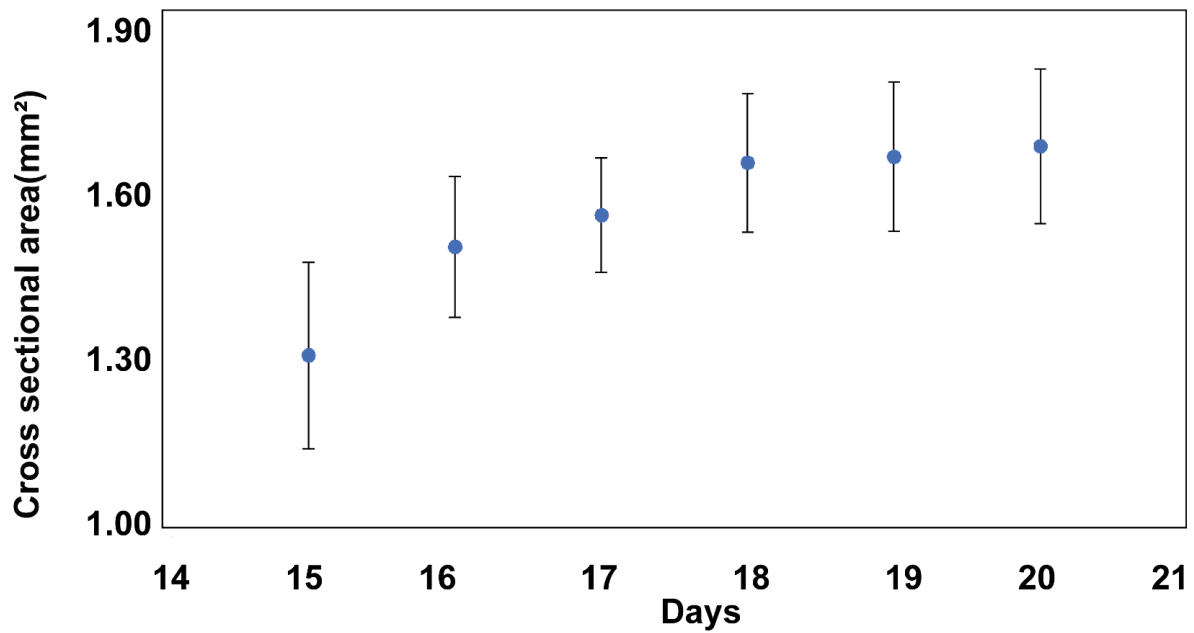

Supplementary Figure 9. Longitudinal growth of cortical organoid in batch 3. a) Estimated area. b) adjusted growth curve over 6 days.
